# Supplementary material
Source: PubMed Central journal article supplement (PMC555706)

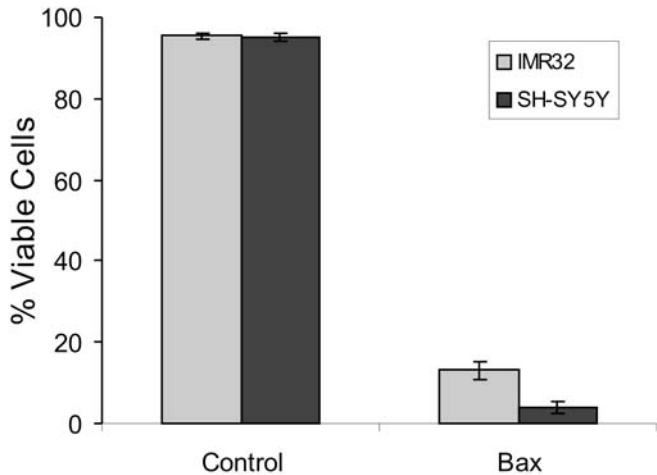

Supplement: pnas_102_13_4842__1.pdf [file pnas_102_13_4842__1.pdf]
